# Supplementary material for: Unique Function of the Bacterial Chromosome Segregation Machinery in Apically Growing Streptomyces - Targeting the Chromosome to New Hyphal Tubes and its Anchorage at the Tips
Source: PubMed Central journal article supplement (PMC5157956; doi:10.1371/journal.pgen.1006488), 2016-12-15
Supplement: pgen.1006488.s001.pdf [file pgen.1006488.s001.pdf]

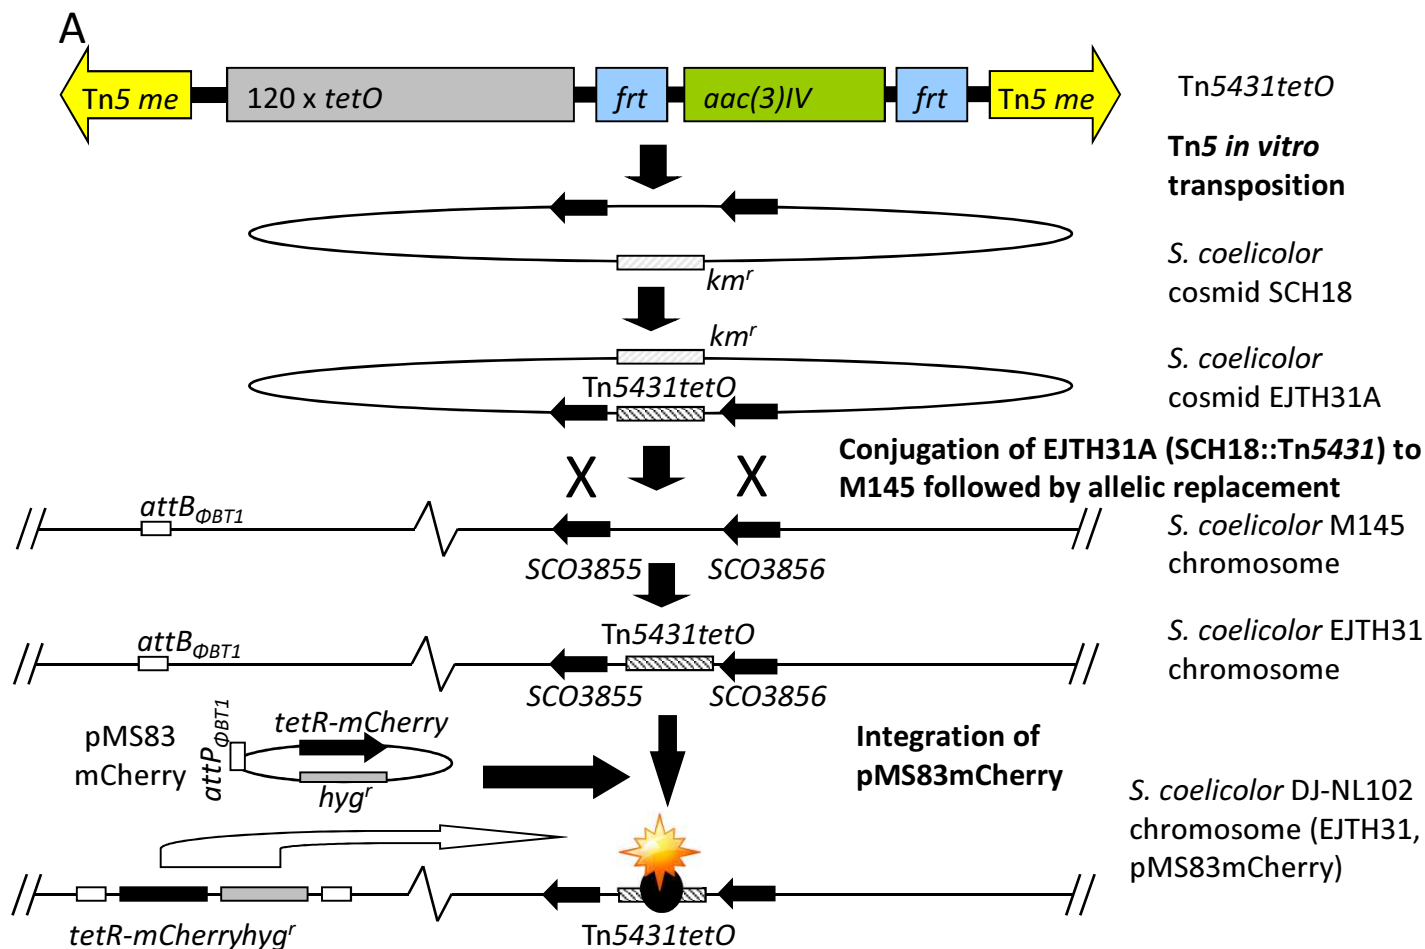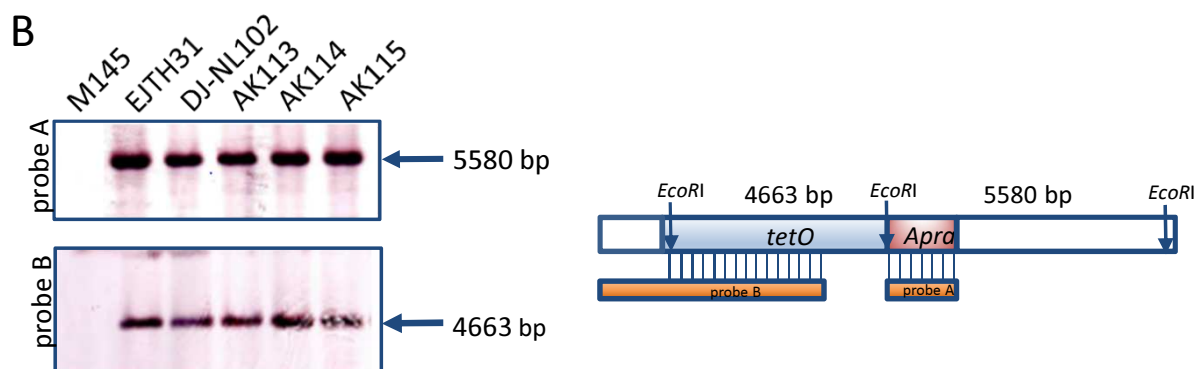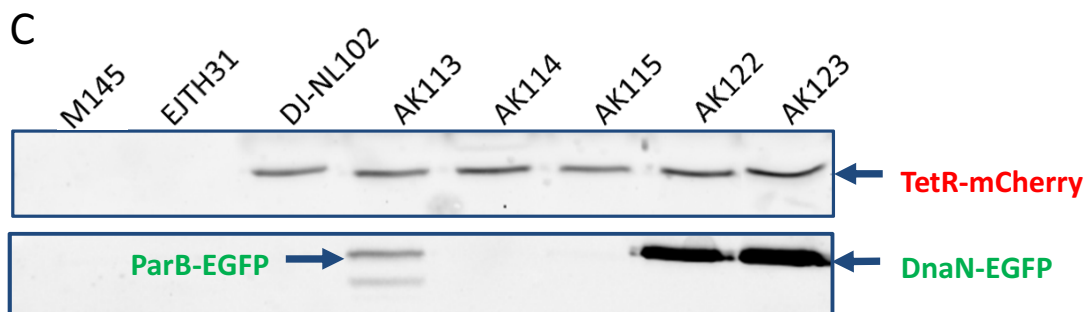

**Fig. S1 Construction and verification of the FROS strains.**

A. Scheme of construction of the FROS strain (DJ-NL102).

B. Southern blotting verification of the FROS strains. The chromosomal DNA was digested with *EcoRI* and the probes were designed as shown in the scheme on the right.

C. Verification of TetR-mCherry, DnaN-EGFP and ParB-EGFP fluorescence in analyzed strains. The cell extracts were analyzed in semi-denatured SDS-PAGE (without heating the samples) and fluorescence was detected using molecular imager PharosFX system.
