# Supplementary material for: Unique Function of the Bacterial Chromosome Segregation Machinery in Apically Growing Streptomyces - Targeting the Chromosome to New Hyphal Tubes and its Anchorage at the Tips
Source: PubMed Central journal article supplement (PMC5157956; doi:10.1371/journal.pgen.1006488), 2016-12-15
Supplement: pgen.1006488.s002.pdf [file pgen.1006488.s002.pdf]

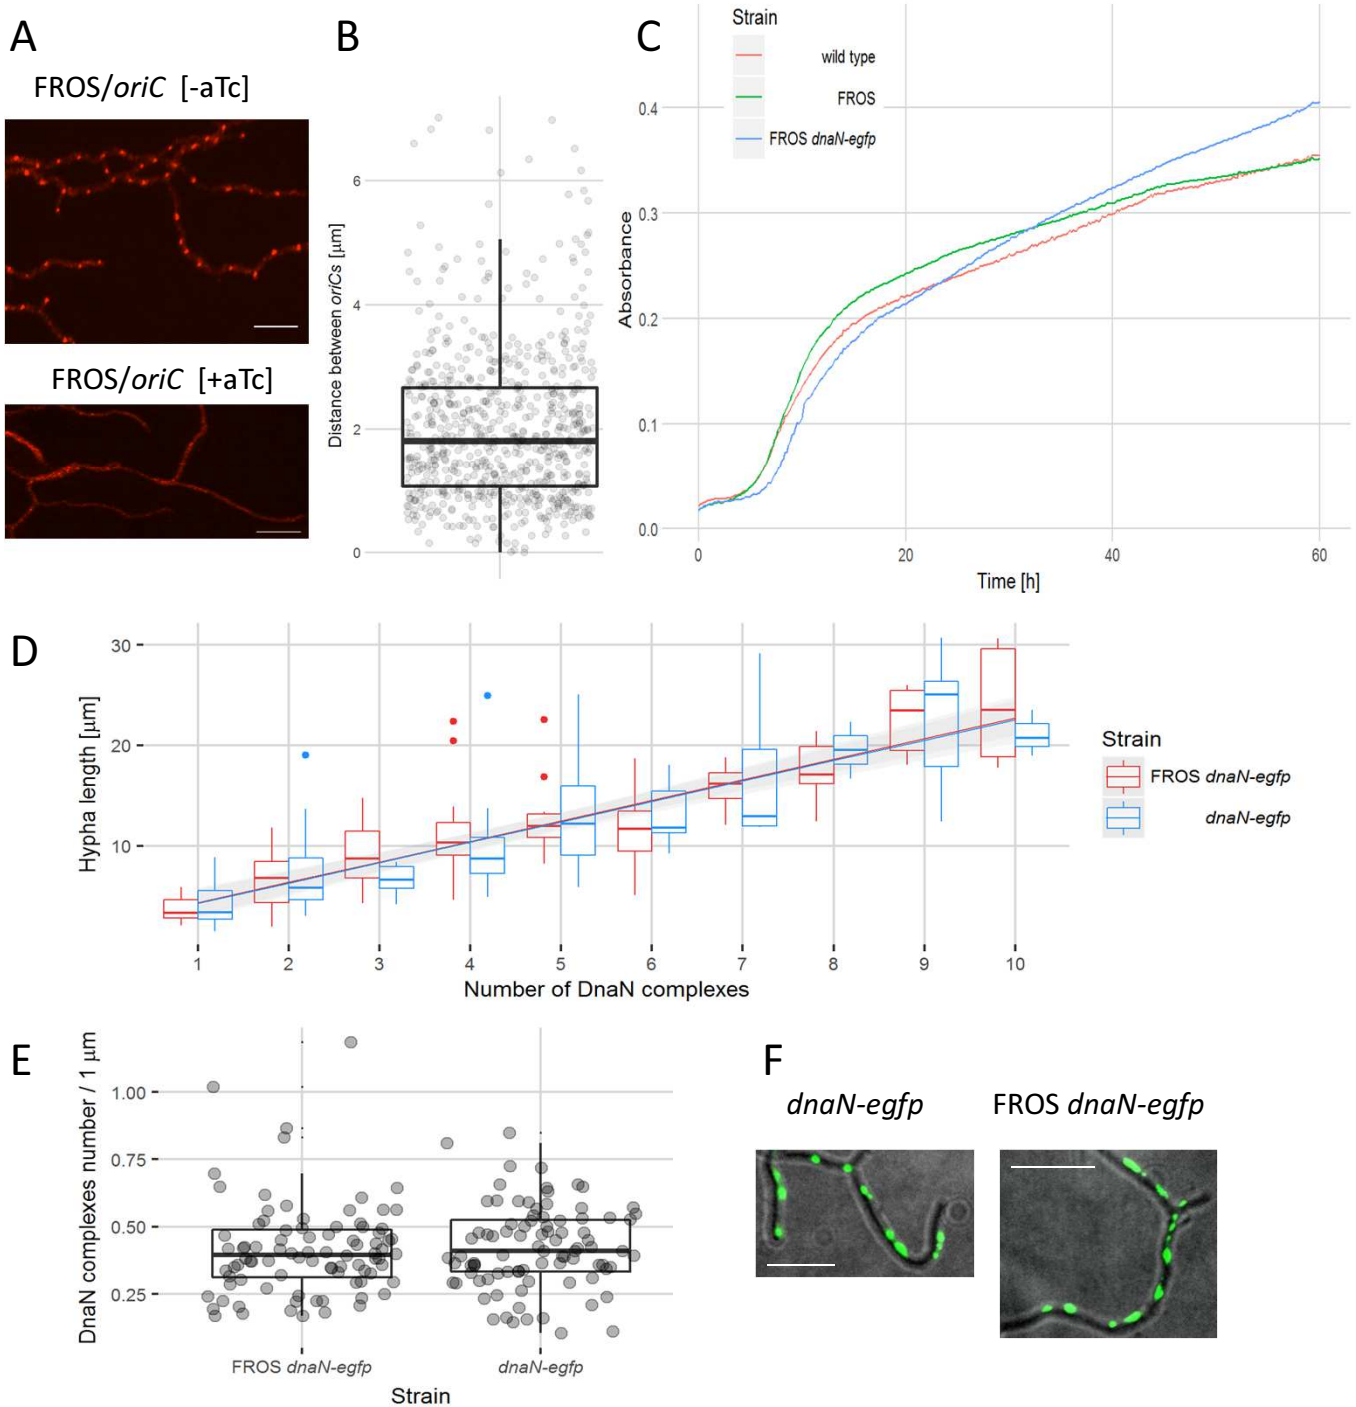

**Fig. S2 Growth and chromosome replication are not disturbed in the FROS strain.**

- A. FROS foci in DJ-NL102 strain hyphae and their disappearance in the presence of 0.1 mg ml<sup>-1</sup> anhydrotetracycline (aTc), scale bar - 5  $\mu\text{m}$ .
- B. The distances between FROS foci in FROS strain (DJ-NL102) hyphae (20 hyphae measured).
- C. Growth rate of wild type (M145), FROS strain (DJ-NL102) and FROS *dnaN-egfp* (AK122) strain. Experiments were performed using a Bioscreen-C (Automated Growth Curves Analysis System, Growth Curves USA) with five replicates for each strain. OD<sub>600</sub> of cultures was measured every 10 minutes for 60 hours at 30°C and the averaged results of replicates were plotted.
- D. Number of replisomes in the hyphae of FROS *dnaN-egfp* (AK122) and control strain *dnaN-egfp* (J3337) in relation to hyphae length.
- E. Distribution of replisomes in the hyphae of FROS *dnaN-egfp* (AK122) and control strain *dnaN-egfp* (J3337).
- F. Images showing the replisomes in hyphae of FROS *dnaN-egfp* (AK122) and control strain *dnaN-egfp* (J3337), scale bar - 5  $\mu\text{m}$ .

Panels B, D, E show conventional boxplots with median and the lower and upper "hinges" that correspond to the first and third quartiles, all observations are marked as semitransparent points.
