# Supplementary material for: Unique Function of the Bacterial Chromosome Segregation Machinery in Apically Growing Streptomyces - Targeting the Chromosome to New Hyphal Tubes and its Anchorage at the Tips
Source: PubMed Central journal article supplement (PMC5157956; doi:10.1371/journal.pgen.1006488), 2016-12-15
Supplement: pgen.1006488.s005.pdf [file pgen.1006488.s005.pdf]

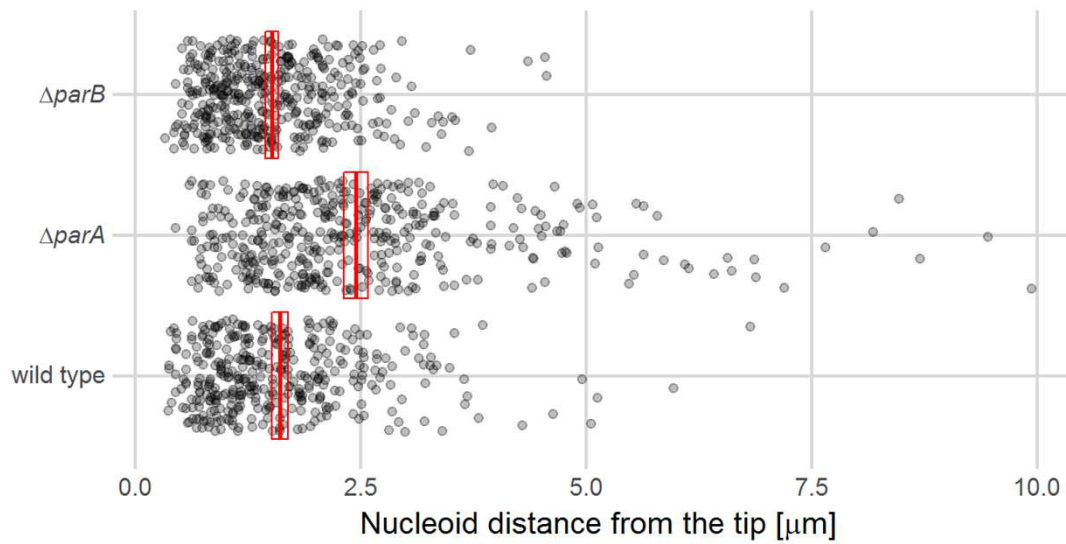

**Fig. S5** Distance of the stained nucleoid from the tip in wild type M145,  $\Delta parA$  (J3306) and  $\Delta parB$  (J3305) strains. Red crossbars show mean (measured for 370-418 hyphae) with 95% confidence intervals.
