# Supplementary material for: Unique Function of the Bacterial Chromosome Segregation Machinery in Apically Growing Streptomyces - Targeting the Chromosome to New Hyphal Tubes and its Anchorage at the Tips
Source: PubMed Central journal article supplement (PMC5157956; doi:10.1371/journal.pgen.1006488), 2016-12-15
Supplement: pgen.1006488.s007.pdf [file pgen.1006488.s007.pdf]

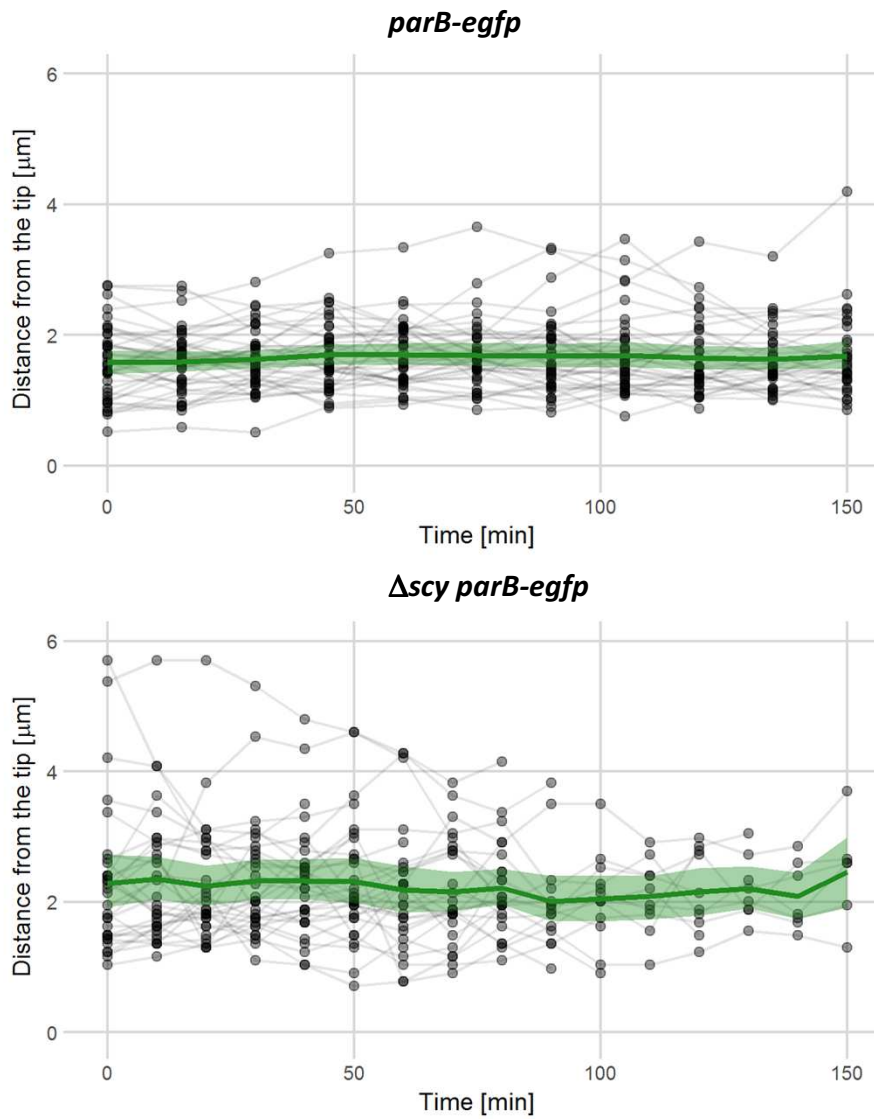

**Fig. S7** Distance of ParB-EGFP from the hyphal tip in "wild type" (J3310) and  $\Delta scy$  (BD05) during growth analyzed from the time of branch emergence (time 0). The line shows the mean with 95% confidence intervals indicated by the green area. 40 hyphae of J3310 strain, and 31 hyphae of BD05 were measured.
