# Supplementary material for: Unique Function of the Bacterial Chromosome Segregation Machinery in Apically Growing Streptomyces - Targeting the Chromosome to New Hyphal Tubes and its Anchorage at the Tips
Source: PubMed Central journal article supplement (PMC5157956; doi:10.1371/journal.pgen.1006488), 2016-12-15
Supplement: pgen.1006488.s009.pdf [file pgen.1006488.s009.pdf]

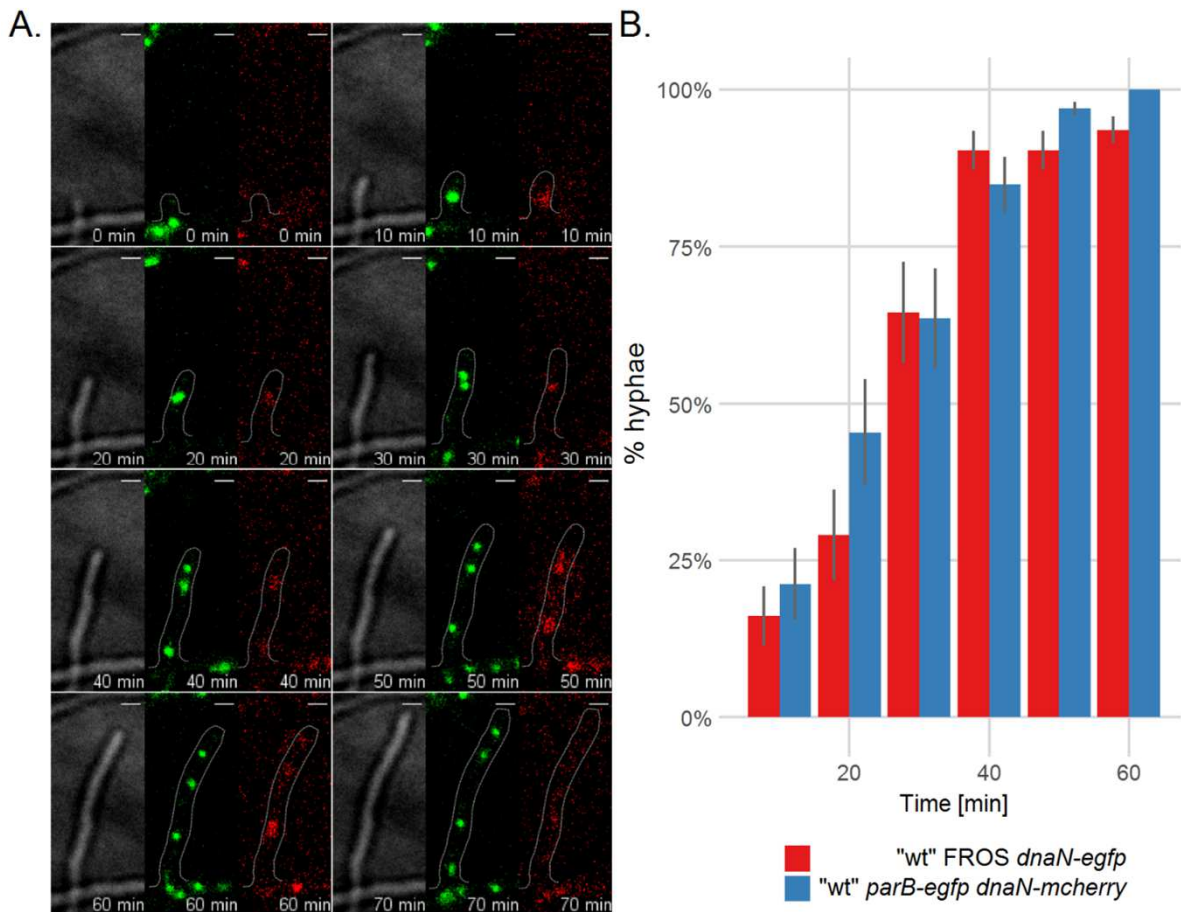

**Fig. S9 ParB binds daughter *oriCs* soon after duplication**

A. Time-lapse snapshots of AK101 hyphae, showing in separate channels: DIC image, ParB-EGFPFP (green) and DnaN-mCherry (red), scale bar - 1  $\mu\text{m}$ .

B. Time of detection of duplicated ParB complexes (blue bars) and FROS signal (red bars) after replisome appearance. Error bars show 95% confidence intervals. The analysis was performed for 29 hyphae of FROS *dnaN-egfp* strain (AK122) and 33 hyphae of *parB-egfp dnaN-mcherry* (AK101) strain.
