# Supplementary material for: Unique Function of the Bacterial Chromosome Segregation Machinery in Apically Growing Streptomyces - Targeting the Chromosome to New Hyphal Tubes and its Anchorage at the Tips
Source: PubMed Central journal article supplement (PMC5157956; doi:10.1371/journal.pgen.1006488), 2016-12-15
Supplement: pgen.1006488.s010.pdf [file pgen.1006488.s010.pdf]

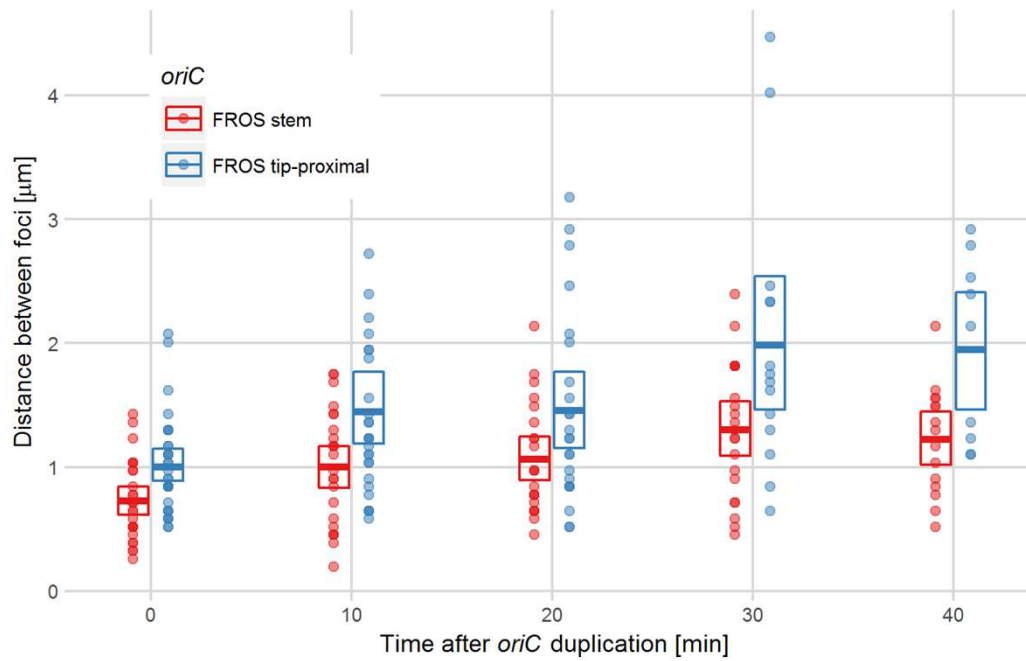

**Fig. S10** Distance between tip-proximal and stem (tip-distal) FROS at the indicated time after their duplication in “wild type” FROS *dnaN-egfp* (AK122). Crossbars show the mean with 95% confidence intervals. The analysis was performed 27 stem and 32 tip-proximal FROS complexes.
