# Supplementary material for: Unique Function of the Bacterial Chromosome Segregation Machinery in Apically Growing Streptomyces - Targeting the Chromosome to New Hyphal Tubes and its Anchorage at the Tips
Source: PubMed Central journal article supplement (PMC5157956; doi:10.1371/journal.pgen.1006488), 2016-12-15
Supplement: pgen.1006488.s011.pdf [file pgen.1006488.s011.pdf]

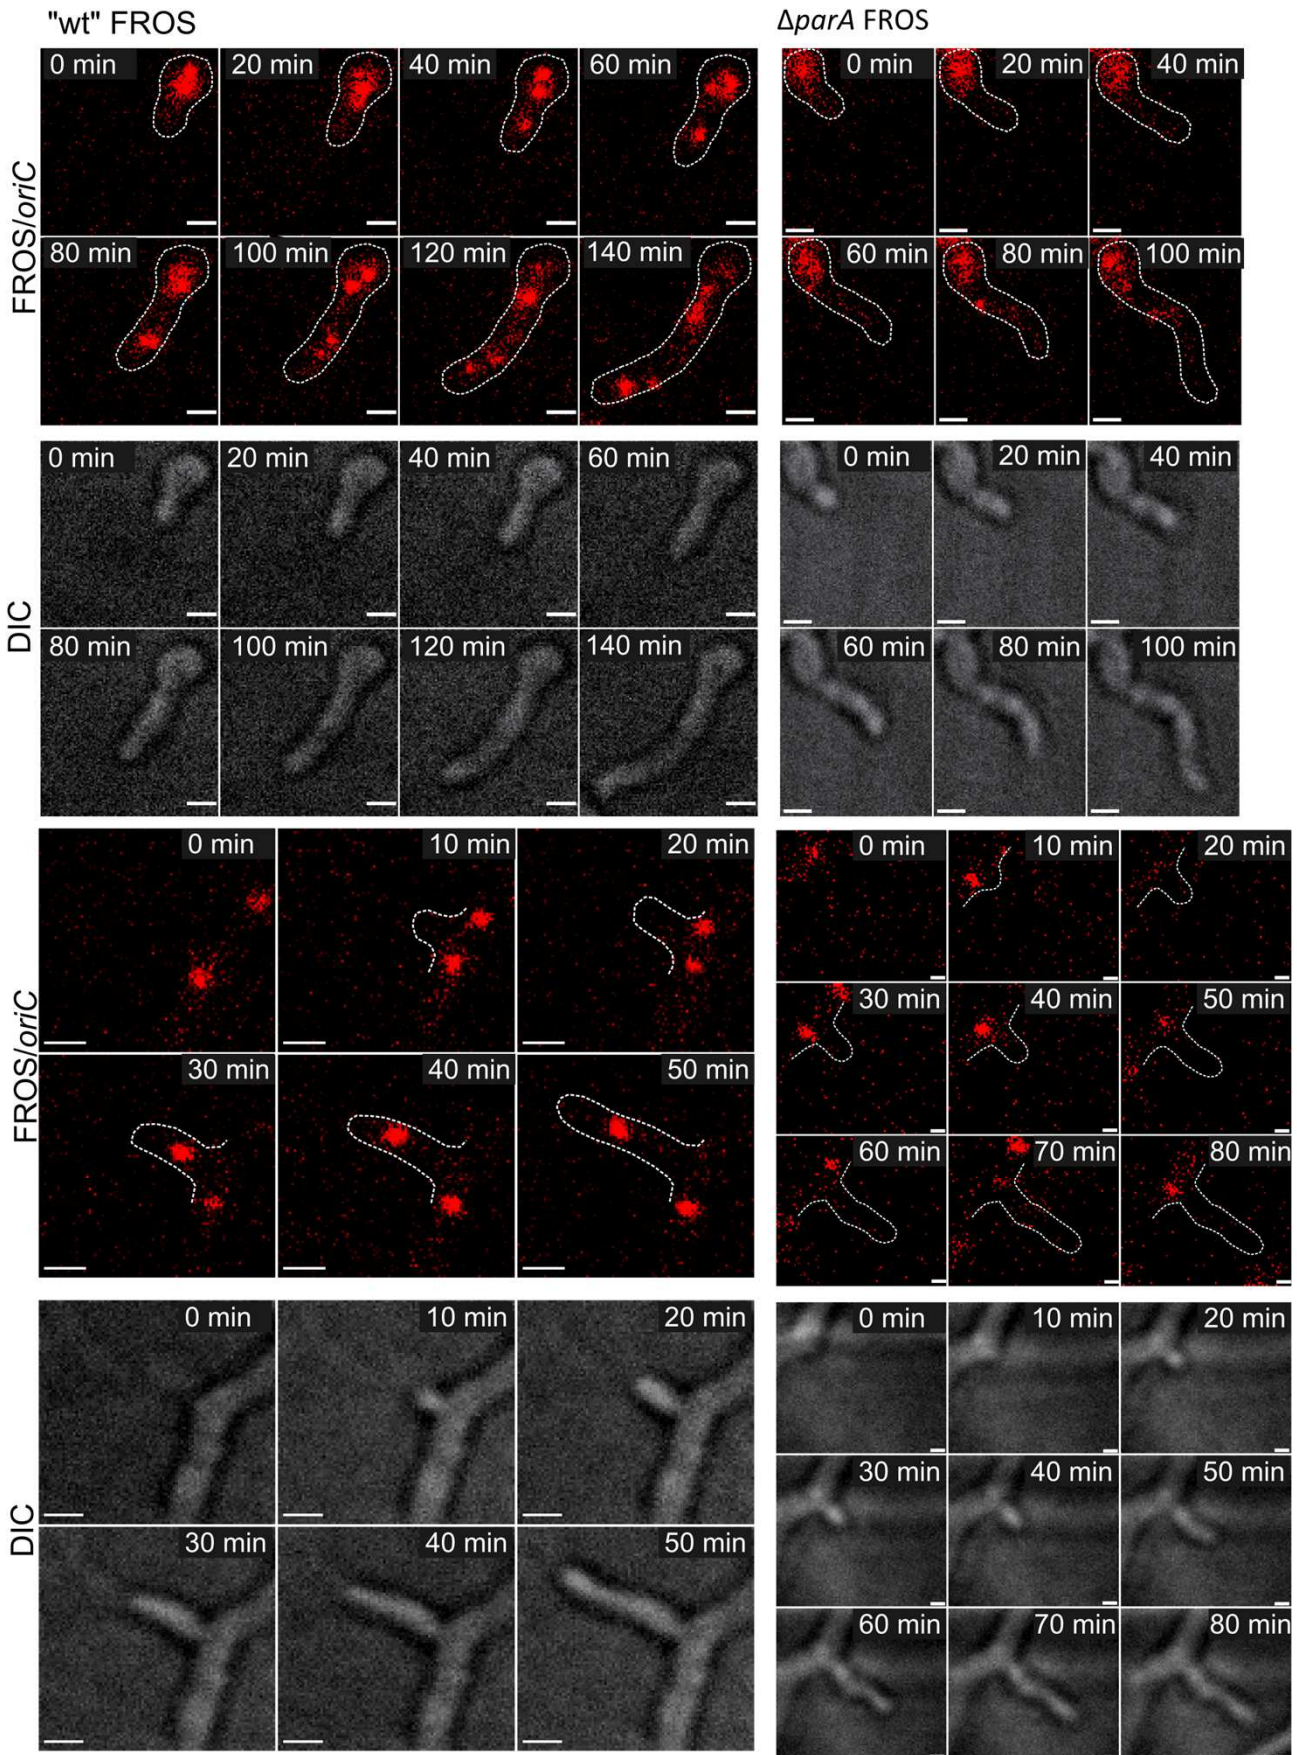

**Fig. S11** Time-lapse snapshots of FROS (TetR-mCherry fluorescence, red) in the germinating spores (top panel) and branching hyphae (bottom panel) of “wild type” FROS (DJ-NL102) and  $\Delta parA$  FROS (AK115) strains. The images show separate channels: TetR-mCherry fluorescence (red) in the hyphae outlined and DIC images (grey), scale bar - 1  $\mu\text{m}$ .
