# Supplementary material for: Unique Function of the Bacterial Chromosome Segregation Machinery in Apically Growing Streptomyces - Targeting the Chromosome to New Hyphal Tubes and its Anchorage at the Tips
Source: PubMed Central journal article supplement (PMC5157956; doi:10.1371/journal.pgen.1006488), 2016-12-15
Supplement: pgen.1006488.s017.pdf [file pgen.1006488.s017.pdf]

**TABLE S1. Strains and plasmids used in this study**

| Strains                            | Relevant genotype and characteristics                                                                                                                                                                               | Source           |
|------------------------------------|---------------------------------------------------------------------------------------------------------------------------------------------------------------------------------------------------------------------|------------------|
| <b><i>E. coli</i></b>              |                                                                                                                                                                                                                     |                  |
| DH5 $\alpha$                       | <i>supeE44, <math>\Delta</math>lacU169 (<math>\phi</math>80lacZ<math>\Delta</math>M15), hsdR17 (r<sub>K</sub><sup>-</sup>, m<sub>K</sub><sup>-</sup>), recA1, endA1, gyrA96, thi-1, relA1</i>                       | Laboratory Stock |
| JM109                              | endA1 glnV44 thi-1 relA1 gyrA96 recA1 mcrB <sup>+</sup> $\Delta$ (lac-proAB) e14-[F' traD36 proAB <sup>+</sup> lacI <sup>q</sup> lacZ $\Delta$ M15] sdR17(r <sub>K</sub> <sup>-</sup> m <sub>K</sub> <sup>+</sup> ) | [1].             |
| BW25113 /pIJ790                    | K12 derivative: $\Delta$ araBAD, $\Delta$ rhaBAD / $\lambda$ -Red ( <i>gam, bet, exo</i> ), <i>araC, rep101</i> (Ts), <i>cat</i> <sup>R</sup>                                                                       | [2]              |
| ET12567 /pUZ8002                   | <i>dam-13::Tn9, dcm, hsdM, hsdR, zjj-201::Tn10/tra</i> , RP4, <i>cat</i> <sup>R</sup> , <i>neo</i> <sup>R</sup>                                                                                                     | [3]              |
| <b><i>S. coelicolor</i></b>        |                                                                                                                                                                                                                     |                  |
| M145                               | SCP1 <sup>-</sup> , SCP2 <sup>-</sup>                                                                                                                                                                               | [4]              |
| J3310                              | M145 <i>parB-egfp</i>                                                                                                                                                                                               | [5]              |
| J3305                              | M145 $\Delta$ <i>parB</i>                                                                                                                                                                                           | [6]              |
| J3306                              | M145 $\Delta$ <i>parA</i>                                                                                                                                                                                           | [7]              |
| J3318                              | M145 <i>parB-egfp</i> $\Delta$ <i>parA</i>                                                                                                                                                                          | [7]              |
| J3337                              | M145 <i>dnaN-egfp::apra</i> ( <i>apra</i> <sup>R</sup> )                                                                                                                                                            | [8]              |
| J3337a                             | M145 <i>dnaN-egfp scar</i> ( <i>apra</i> <sup>S</sup> )                                                                                                                                                             | This work        |
| J3336                              | M145 <i>dnaN-egfp::apra</i> $\Delta$ <i>parA</i>                                                                                                                                                                    | This work        |
| J3336a                             | M145 <i>dnaN-egfp scar</i> $\Delta$ <i>parA</i> ( <i>apra</i> <sup>S</sup> )                                                                                                                                        | This work        |
| K112                               | M145 $\Delta$ <i>scy</i>                                                                                                                                                                                            | [9]              |
| BD05                               | M145 $\Delta$ <i>scy, parB-egfp-apra</i>                                                                                                                                                                            | This work        |
| BD08                               | M145 <i>parA S249Y, E250V</i>                                                                                                                                                                                       | [10]             |
| DJ590                              | M145 <i>parA-egfp</i>                                                                                                                                                                                               | [10]             |
| DJ598                              | M145 <i>parA S249Y, E250V parB-egfp-apra</i>                                                                                                                                                                        | This work        |
| DJ532                              | J3310 pIJ6902 <i>parA</i> ( <i>hyg</i> <sup>R</sup> )                                                                                                                                                               | This work        |
| EJTH31                             | M145 Tn5431 <i>tetO-apra</i> ( <i>apra</i> <sup>R</sup> )                                                                                                                                                           | This work        |
| DJ-NL102                           | M145 Tn5431 <i>tetO-apra</i> pMS83- <i>mCherry</i> ( <i>apra</i> <sup>R</sup> , <i>hyg</i> <sup>R</sup> )                                                                                                           | This work        |
| AK101                              | M145 <i>parB-egfp dnaN-mcherry::apra</i>                                                                                                                                                                            | This work        |
| AK113                              | J3310 Tn5431 <i>tetO-apra, pMS83-mCherry</i> ( <i>apra</i> <sup>R</sup> , <i>hyg</i> <sup>R</sup> )                                                                                                                 | This work        |
| AK114                              | J3305 Tn5431 <i>tetO-apra, pMS83-mCherry</i> ( <i>apra</i> <sup>R</sup> , <i>hyg</i> <sup>R</sup> )                                                                                                                 | This work        |
| AK115                              | J3306 Tn5431 <i>tetO-apra, pMS83-mCherry</i> ( <i>apra</i> <sup>R</sup> , <i>hyg</i> <sup>R</sup> )                                                                                                                 | This work        |
| AK122                              | J3337a Tn5431 <i>tetO-apra, pMS83-mCherry</i> ( <i>apra</i> <sup>R</sup> , <i>hyg</i> <sup>R</sup> )                                                                                                                | This work        |
| AK123                              | J3336a Tn5431 <i>tetO-apra, pMS83-mCherry</i> ( <i>apra</i> <sup>R</sup> , <i>hyg</i> <sup>R</sup> )                                                                                                                | This work        |
| <b>Constructs</b>                  |                                                                                                                                                                                                                     |                  |
| StH18                              | Supercos-1 containing chromosomal DNA from <i>S. coelicolor</i> ; <i>amp</i> <sup>R</sup> <i>km</i> <sup>R</sup> , cosmid carrying <i>oriC</i> region                                                               | [11]             |
| pIJ6902 <i>parA</i> ( <i>hyg</i> ) | <i>hyg</i> <sup>R</sup> pIJ6902-derivative, carrying <i>parA</i> under the control of the thiostrepton inducible <i>PtipA</i> promoter                                                                              | [12]             |
| pMS83                              | pMS81 with fragment containing <i>tetR</i> from pPC49 cloned in NsiI/KpnI sites, integrates at the <i>attB</i> <sub><math>\phi</math>BT1</sub> attachment site on the chromosome of <i>Streptomyces coelicolor</i>  | [13]             |
| pMS83- <i>mCherry</i>              | <i>tetR-mCherry</i> under the control constitutive promoter from phage I19 SF14 in the integrative plasmid                                                                                                          | This work        |
| pLAU44                             | Tandem <i>tetO</i> array                                                                                                                                                                                            | [14]             |
| pIJ773                             | <i>apra</i> <sup>R</sup> , <i>oriT</i>                                                                                                                                                                              | [2]              |
| pMOD<MCS>                          | Tn5 mosaic ends                                                                                                                                                                                                     | Epilcentre       |

|                            |                                                                                                                                                                      |           |
|----------------------------|----------------------------------------------------------------------------------------------------------------------------------------------------------------------|-----------|
| pUC44                      | <i>tetO</i> array cloned into pUC18                                                                                                                                  | This work |
| p44FRT                     | <i>apra<sup>R</sup></i> , <i>oriT</i> cloned into pUC44                                                                                                              | This work |
| p44FMOD                    | Source plasmid for Tn5431                                                                                                                                            | This work |
| EJTH31A<br>( <i>tetO</i> ) | StH18 containing Tn5431, <i>apra<sup>R</sup></i> and <i>oriT</i>                                                                                                     | This work |
| StH18 <i>dnaN-egfp</i>     | Supercos-1 containing chromosomal DNA from <i>S. coelicolor</i> ; <i>amp<sup>R</sup> km<sup>R</sup></i> , cosmid carrying <i>egfp</i> downstream of <i>dnaN</i> gene | This work |

1. Yanisch-Perron C, Vieira J, Messing J. Improved M13 phage cloning vectors and host strains: nucleotide sequences of the M13mp18 and pUC19 vectors. *Gene*. 1985;33: 103–119.
2. Gust B, Challis GL, Fowler K, Kieser T, Chater KF. PCR-targeted *Streptomyces* gene replacement identifies a protein domain needed for biosynthesis of the sesquiterpene soil odor geosmin. *Proceedings of the National Academy of Sciences*. 2003;100: 1541–1546.
3. Paget MS, Chamberlin L, Atrih A, Foster SJ, Buttner MJ. Evidence that the extracytoplasmic function sigma factor sigma E is required for normal cell wall structure in *Streptomyces coelicolor* A3(2). *Journal of bacteriology*. 1999;181: 204–211.
4. Kieser T, Bibb MJ, Buttner MJ, Chater KF, Hopwood DA. *Practical Streptomyces Genetics*. John Innes Centre Ltd. 2000; 529. doi:10.4016/28481.01
5. Jakimowicz D, Gust B, Zakrzewska-Czerwińska J, Chater KF. Developmental-Stage-Specific Assembly of ParB Complexes in *Streptomyces coelicolor* Hyphae. *Journal of Bacteriology*. 2005;187: 3572–3580. doi:10.1128/JB.187.10.3572
6. Kois A, Swiatek M, Jakimowicz D, Zakrzewska-Czerwińska J. SMC protein-dependent chromosome condensation during aerial hyphal development in *Streptomyces*. *Journal of bacteriology*. 2009;191: 310–9. doi:10.1128/JB.00513-08
7. Jakimowicz D, Zydek P, Kois A, Zakrzewska-Czerwińska J, Chater KF. Alignment of multiple chromosomes along helical ParA scaffolding in sporulating *Streptomyces* hyphae. *Molecular microbiology*. 2007;65: 625–41. doi:10.1111/j.1365-2958.2007.05815.x
8. Ruban-Ośmiałowska B, Jakimowicz D, Smulczyk-Krawczyszyn A, Chater KF, Zakrzewska-Czerwińska J. Replisome localization in vegetative and aerial hyphae of *Streptomyces coelicolor*. *Journal of bacteriology*. 2006;188: 7311–6. doi:10.1128/JB.00940-06
9. Holmes NA, Walshaw J, Leggett RM, Thibessard A, Dalton KA, Gillespie MD, et al. Coiled-coil protein Scy is a key component of a multiprotein assembly controlling polarized growth in *Streptomyces*. *Proceedings of the National Academy of Sciences of the United States of America*. 2013;110: E397-406. doi:10.1073/pnas.1210657110
10. Ditekowski B, Holmes N, Rydzak J, Donczew M, Bezulska M, Ginda K, et al. Dynamic interplay of ParA with the polarity protein, Scy, coordinates the growth with chromosome segregation in *Streptomyces coelicolor*. *Open biology*. 2013;3: 130006. doi:10.1098/rsob.130006
11. Redenbach M, Kieser HM, Denapaite D, Eichner A, Cullum J, Kinashi H, et al. A set of ordered cosmids and a detailed genetic and physical map for the 8 Mb *Streptomyces coelicolor* A3(2) chromosome. *Mol Microbiol*. 1996;21: 77–96.
12. Ditekowski B, Troć P, Ginda K, Donczew M, Chater KF, Zakrzewska-Czerwińska J, et al. The actinobacterial signature protein ParJ (SCO1662) regulates ParA polymerization and affects chromosome segregation and cell division during *Streptomyces* sporulation. *Molecular microbiology*. 2010;78: 1403–15. doi:10.1111/j.1365-2958.2010.07409.x
13. Gregory MA, Till R, Smith MCM. Integration Site for *Streptomyces* Phage  $\phi$ BT1 and Development of Site-Specific Integrating Vectors. *Journal of bacteriology*. 2003;185: 5320–5323. doi:10.1128/JB.185.17.5320
14. Lau IF, Filipe SR, Søballe B, Økstad O, Barre F, Sherratt DJ. Spatial and temporal organization of replicating *Escherichia coli* chromosomes. *Molecular Microbiology*. 2003;49: 731–743. doi:10.1046/j.1365-2958.2003.03640.x
