# Supplementary material for: Unique Function of the Bacterial Chromosome Segregation Machinery in Apically Growing Streptomyces - Targeting the Chromosome to New Hyphal Tubes and its Anchorage at the Tips
Source: PubMed Central journal article supplement (PMC5157956; doi:10.1371/journal.pgen.1006488), 2016-12-15
Supplement: pgen.1006488.s018.pdf [file pgen.1006488.s018.pdf]

**TABLE S2. Oligonucleotides used in this study**

| <b>Name</b> | <b>Sequence</b>                                                                                  | <b>Application</b>                         |
|-------------|--------------------------------------------------------------------------------------------------|--------------------------------------------|
| cherry_f    | CATATGTGGCCTGGAGAAACAGCTAAAGTGCGAAAGCGGCCTGC<br>CGGGCCCGGAGCTGCCGGCCCGGAGGTGAGCAAGGGCGAGG<br>AGG | <i>mCherry</i> gene<br>amplification       |
| cherry_r    | ATGCATTTACTTGTACAGCTCGTCCATGCC                                                                   |                                            |
| EZR1        | ATGCGCTCCATCAAGAAGAG                                                                             | Tn5431<br>sequencing [1]                   |
| DnaNspr_fw  | GACGGTCTGAGCGCCATCGACT                                                                           | verification of<br><i>dnaN</i> gene        |
| DnaNspr_rv  | GCGTCGAGCCTAAACCCGCAC                                                                            |                                            |
| ParBgfplink | CCTTCTGGAGGGCGAGGACGAGGACGGGGACGCCGAGTCCCTC<br>C CGGGCCCGGAGCTG                                  | <i>egfp-apra</i><br>amplification          |
| Bdownrev    | GGCCTTGTGCCAGCGGCTTTGCTTT                                                                        |                                            |
| DnaNRSwa    | GGACAGCCGCCGACGGCGCCACCGGCCGGCGGGCGACGGTATT<br>TAAATTGTAGGCTGGAGCTGCTTC                          | mCherry-apra<br>cassette<br>amplification  |
| DnaNF       | GGCCTACAAGTACCTGATCATGCCGGTGC GGCTGAGCGGCCTGC<br>CGGGCCCGGAGCTG                                  |                                            |
| Blap1apraRV | AATCTAAAGTATATATGAGTAAACTTGGTCTGACAGTTAAGTTCC<br>CGCCAGCCTCGCAGA                                 | <i>amp<sup>R</sup></i> gene<br>replacement |
| Blap2apraFW | CCCTGATAAATGCTTCAATAATATTGAAAAAGGAAGAGTATAACT<br>TATGAGCTCAGCCAATC                               |                                            |

1. Bishop A, Fielding S, Dyson P, Herron P. Systematic insertional mutagenesis of a streptomyces genome: a link between osmoadaptation and antibiotic production. *Genome Research*. 2004;14: 893–900. doi:10.1101/gr.1710304
